# Supplementary material for: High resolution mass spectrometry of respiratory viruses: beyond MALDI-ToF instruments for next generation viral typing, subtyping, variant and sub-variant identification
Source: Royal Society of Chemistry journal article supplement (doi:10.1039/d3an00953j), 2023-01-01
Supplement: d3an00953j1.pdf [file d3an00953j1.pdf]

Supplementary Table 1 Tryptic peptide mass biomarkers for spike and nucleocapsid proteins for detection by high resolution MALDI-MS [36]

| <b>m/z (mono) theoretical</b> | <b>viral protein code</b> | <b>residues*</b> | <b>sequence**</b>             | <b>domain***</b>                         |
|-------------------------------|---------------------------|------------------|-------------------------------|------------------------------------------|
| 749.3536                      | N                         | 178-185          | GGSQASSR                      | RNA-binding domain                       |
| 831.4570                      | N                         | 227-233          | LNQLESK                       | dimerization domain                      |
| 843.4247                      | S                         | 1206-1211        | YEQYIK                        | S2 subunit heptad repeat 2 (HR2) domain  |
| 899.4945                      | S                         | 409-417          | QIAPGQTGK                     | S1 subunit C-terminal domain (CTD)       |
| 1085.5374                     | S                         | 311-319          | GIYQTSNFR                     | undefined                                |
| 1126.5640                     | N                         | 267-276          | <i>AYNVTQAFGR</i>             | dimerization domain                      |
| 1224.6259                     | S                         | 103-113          | GWIFGTTLDSK                   | S1 subunit N-terminal domain (NTD)       |
| 1267.6946                     | S                         | 558-567 (1)      | KFLPFQQFGR                    | undefined                                |
| 1281.5892                     | S                         | 836-847          | QYGDCLGDIAAR                  | S2 subunit fusion peptide (FP)           |
| 1455.7550                     | S                         | 404-417 (1)      | GDEVQRQIAPGQTGK               | S1 subunit C-terminal domain (CTD)       |
| 1670.8894                     | N                         | 210-226          | MAGNGGDAALALLLLDR             | undefined                                |
| 1788.8511                     | N                         | 278-293          | GPEQTQGNFGDQELIR              | dimerization domain                      |
| 1989.9738                     | S                         | 387-403          | LNDLCFTNVYADSFVIR             | S1 subunit receptor binding domain (RBD) |
| 2040.0007                     | S                         | 329-346          | FPNITNLCPFGEVFNATR            | S1 subunit receptor binding domain (RBD) |
| 2181.0207                     | N                         | 69-88            | GQGVPIINTNSSPDDQIGYYR         | RNA-binding domain                       |
| 2267.0807                     | N                         | 108-127          | <i>WYFYLLGTGPEAGLPYGANK</i>   | N-terminal domain (NTD)                  |
| 2324.1894                     | N                         | 41-61            | <i>RPQGLPNNTASWFTALTQH GK</i> | RNA-binding domain                       |
| 2742.2425                     | S                         | 159-182          | VYSSANNCTFEYVSQPFLMDLEGK      | S1 subunit N-terminal domain (NTD)       |

\*residues denoted with a (1) are associated with one missed cleavage site; all others contain no missed cleavage sites

\*\* nucleocapsid (N) segments detected in separate study (Yoshinari et al. [41]) are shown in italics

\*\*\*as defined on UniPro knowledge base (uniprotkb) at <https://covid-19.uniprot.org/uniprotkb/>

Supplementary Table 2 Spike protein tryptic peptides with masses unique to a specific omicron lineage [38]\*

| lineage     | mutation | residues**         | subunit | sequence                                         | tryptic peptide mass [M+H] <sup>+</sup> monoisotopic |
|-------------|----------|--------------------|---------|--------------------------------------------------|------------------------------------------------------|
| BA.1        | Δ143-145 | 130-147 (-143-145) | S1      | VCEFQFCNDPFLDHK                                  | 1841.7986                                            |
| BA.1        | +EPE214  | 214-239            | S1      | EPEDLPQGFSALEPLVDLPIGINITR                       | 2833.4982                                            |
| BA.1        | G339D    | 329-346            | S1      | FPNITNLCPFDEVFNATR                               | 2098.0063                                            |
| BA.1        | S371L    | 358-378            | S1      | ISNCVADYSVLYNLAPFFTFK                            | 2412.1945                                            |
| BA.1        | G496S    | 494-498            | S1      | SYSFR ***                                        | 659.3148                                             |
| BA.1        | T547K    | 538-547            | S1      | CVNFNFNGLK                                       | 1155.5616                                            |
| BA.1        | L981F    | 970-983            | S2      | FGAISSVLNDIFSR                                   | 1525.8010                                            |
| BA.1.1      | R346K    | 341-346            | S1      | GDEVK ***                                        | 547.2723                                             |
| BA.2.12.1   | L452Q    | 452-454            | S1      | QFR ***                                          | 450.2460                                             |
| BA.2.12.1   | S704L    | 686-733            | S2      | SVASQSIAYTMSLGAENLVAYSNNNSIAIPTNFTISVTTEILPVSMTK | 5047.5894                                            |
| BA.2.75     | K147E    | 130-150            | S1      | VCEFQFCNDPFLDVYYHENNK                            | 2624.1221                                            |
| BA.2.75     | F157L    | 152-158            | S1      | MESELR                                           | 764.3608                                             |
| BA.2.75     | I210V    | 207-214            | S1      | HTPVNLGR                                         | 893.4952                                             |
| BA.2.75     | G339H    | 336-346            | S1      | FPNITNLCPFHEVFNATR                               | 2120.0383                                            |
| BA.4 / BA.5 | L452R    | 445-452            | S1      | VGGNYNYR                                         | 942.4429                                             |
| BA.4 / BA.5 | F486V    | 479-498            | S1      | PCNGVAGVNCYFPLQSYGFR                             | 2192.0052                                            |
| BA.5        | G3V      | 1-21               | S1      | MFVFLVLLPLVSSQCVNLITR                            | 2392.3495                                            |
| BA.5        | T71I     | 42-72              | S1      | SSVLHSTQDLFLPFFSNVTWFHAISGTNGIK                  | 3450.7481                                            |

\*or unique to the closely related BA.4 / BA.5 lineages

\*\*residue numbering is associated with the protein sequence for particular sub-variant which vary from one to the next due to deletions and insertions

\*\*\*shares its sequence with a known protein of the human proteome based on a BLASTp search.
